# Supplementary material for: Effective use of PI3K inhibitor BKM120 and PARP inhibitor Olaparib to treat PIK3CA mutant ovarian cancer
Source: PubMed Central journal article supplement (PMC4914348; doi:10.18632/oncotarget.7549), 2016-02-21
Supplement: oncotarget-07-13153-s001.pdf [file oncotarget-07-13153-s001.pdf]

## Effective use of PI3K inhibitor BKM120 and PARP inhibitor Olaparib to treat PIK3CA mutant ovarian cancer

### Supplementary Materials

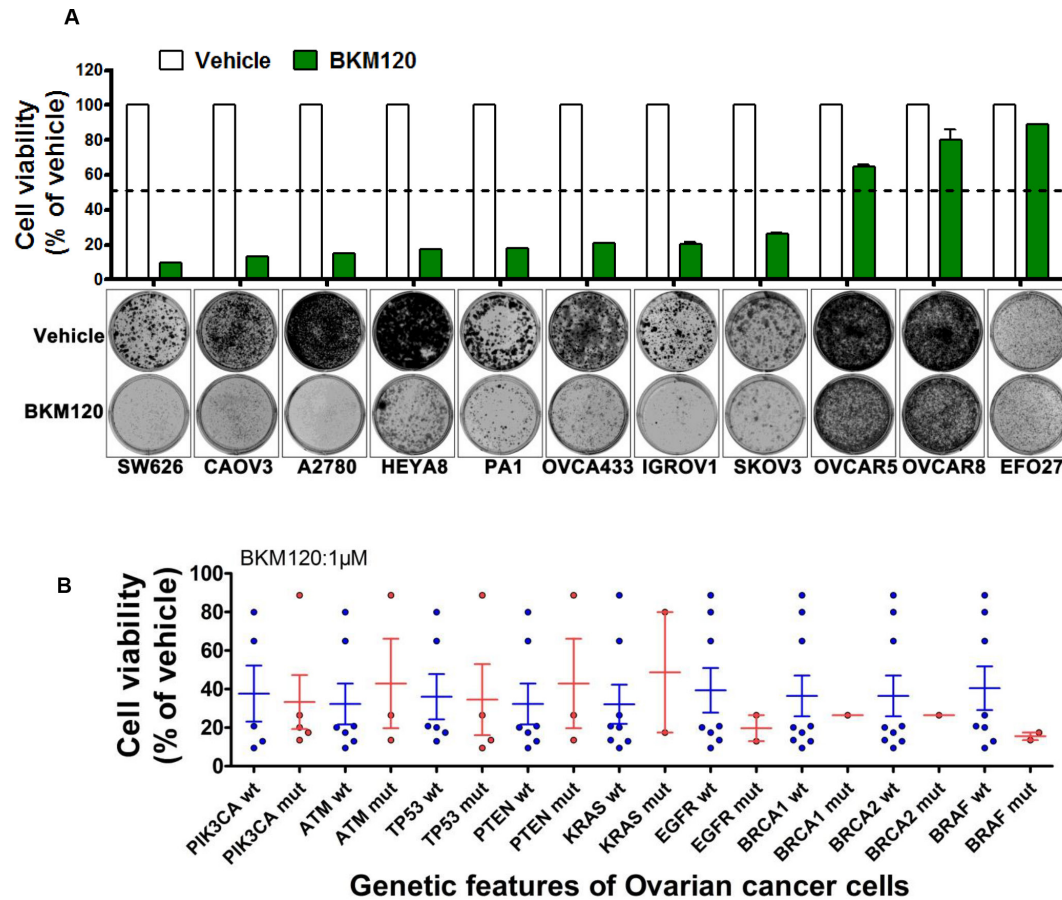

**Supplementary Figure S1: Responses of ovarian cancer cells to BKM120 as a single agent.** (A) Ovarian cancer cell lines as indicated were cultured in plates with or without 1  $\mu$ M BKM120. On day 10, the plates were stained with crystal violet and representative images were shown. Mean  $\pm$  S.D. for three independent experiments were shown. (B) The data of genetic features of ovarian cancer cells derived from COSMIC (<http://www.sanger.ac.uk/perl/genetics/CGP/cosmic>).

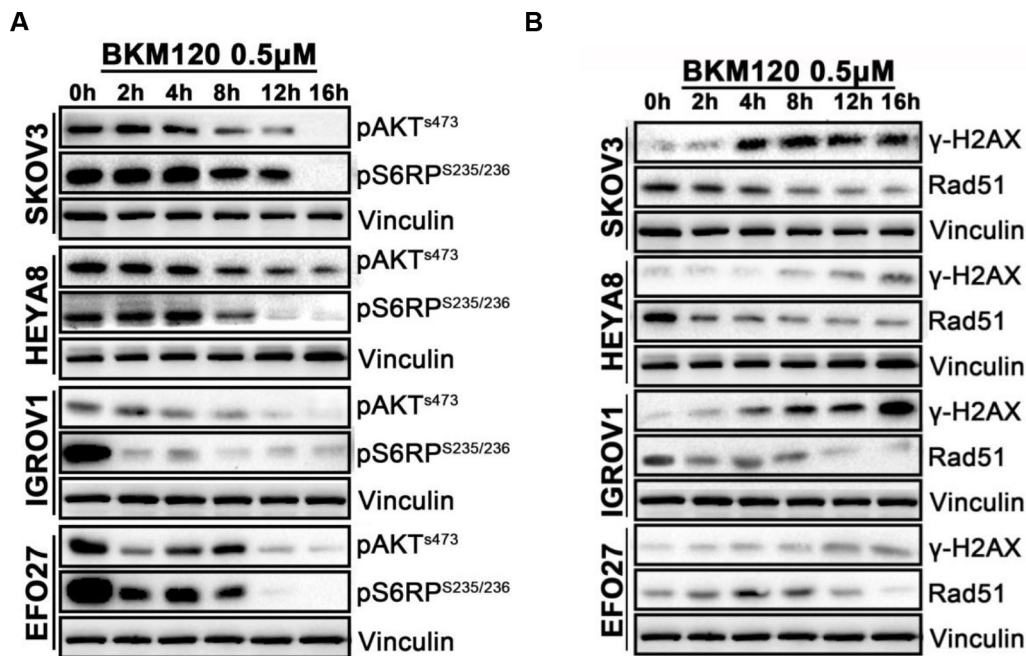

**Supplementary Figure S2: Effects of BKM120 on PI3K/AKT/mTOR signaling and DNA damage response in ovarian cancer cells.** (A and B) The given cell lines were treated with 0.5  $\mu$ M BKM120 for different times as indicated. Western blot analysis of proteins (pAKT, pS6RP,  $\gamma$ H2AX, and RAD51) in ovarian cancer cells treated with BKM120. Vinculin was used as a loading control. Representative images from three independent experiments were shown.

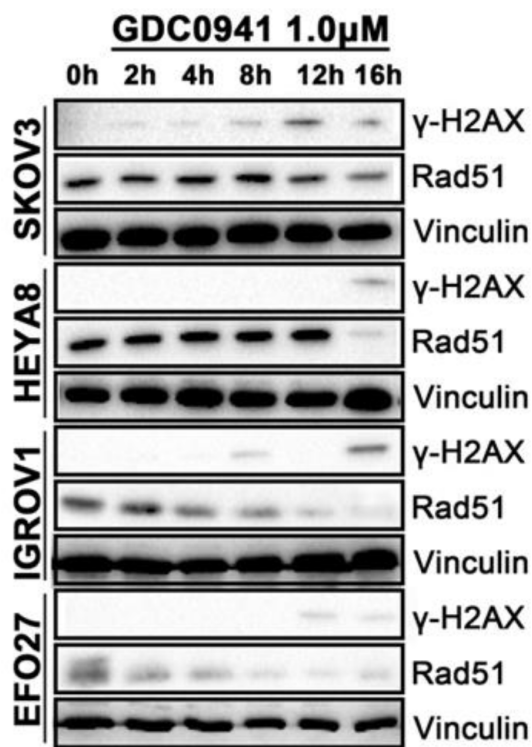

**Supplementary Figure S3: Effects of GDC0941 on DNA damage response in ovarian cancer cells.** The given cell lines were treated with 1.0  $\mu$ M GDC0941 for different times as indicated. Western blot analysis of proteins ( $\gamma$ H2AX, and RAD51) in ovarian cancer cells treated with GDC0941. Vinculin was used as a loading control. Representative images from three independent experiments were shown.

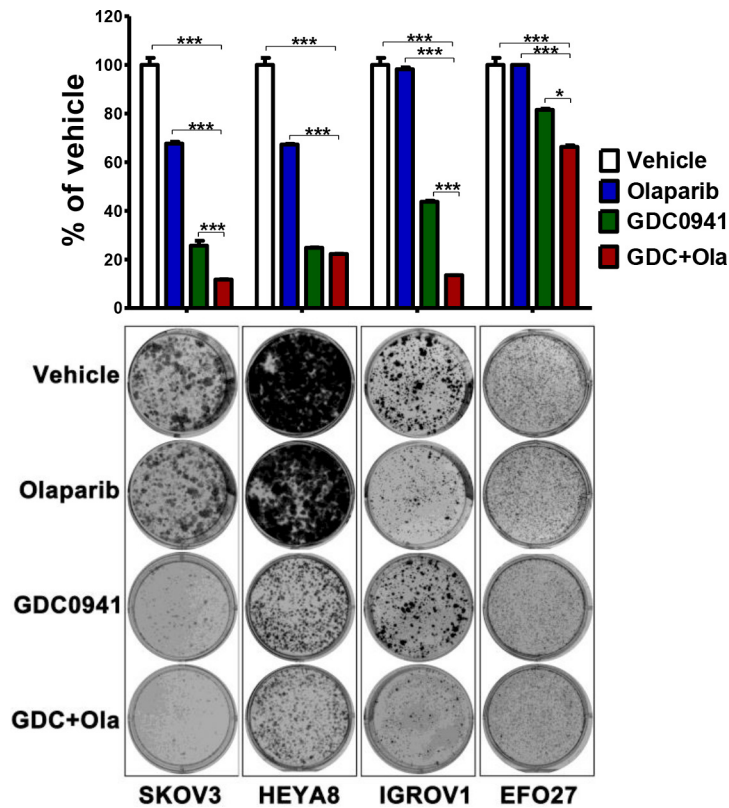

**Supplementary Figure S4: Responses of ovarian cancer cells to GDC0941 and Olaparib as single agents and in combination.** Ovarian cancer cell lines as indicated were cultured in plates with or without 1  $\mu$ M GDC-0941, 2  $\mu$ M Olaparib or in combination. On day 10, the plates were stained with crystal violet and representative images were shown. Mean  $\pm$  S.D. for three independent experiments were shown. \* $P$  < 0.05; \*\* $P$  < 0.01; \*\*\* $P$  < 0.001.

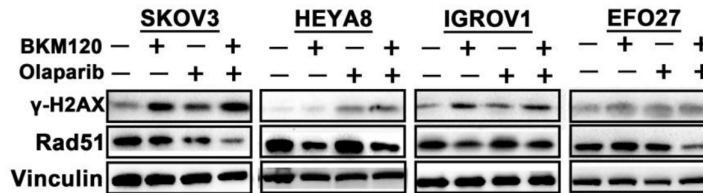

**Supplementary Figure S5: Effects of BKM120 and Olaparib as single agents and in combination on DNA damage response in ovarian cancer cells.** Western blot analysis of proteins ( $\gamma$ H2AX and RAD51) as indicated in ovarian cancer cells treated with BKM120 and Olaparib as single agents or in combination for 48 hours. Vinculin was used as a loading control.

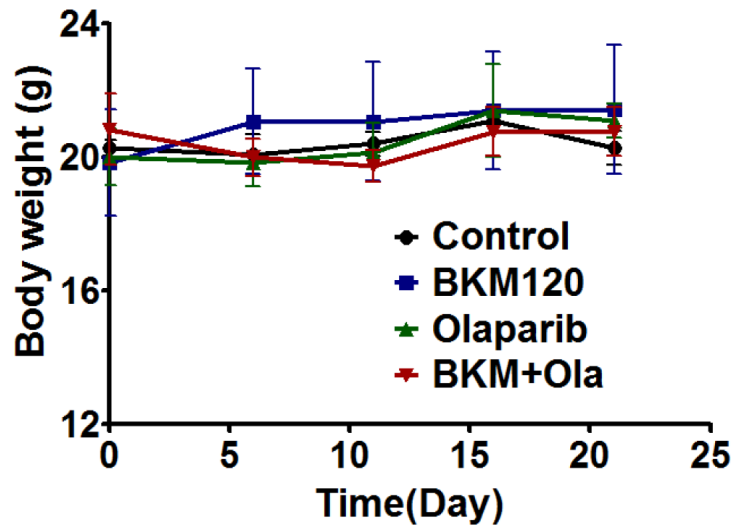

**Supplementary Figure S6: Body weight measurement of mice bearing xenografts of SKOV3-Luc as shown in Figure 6.** Data are means  $\pm$  S.E.M. ( $n = 6$  per treatment group). Treatment began on day 0. There was no statistical difference in the body weights of either group of mice throughout the 3-week study.

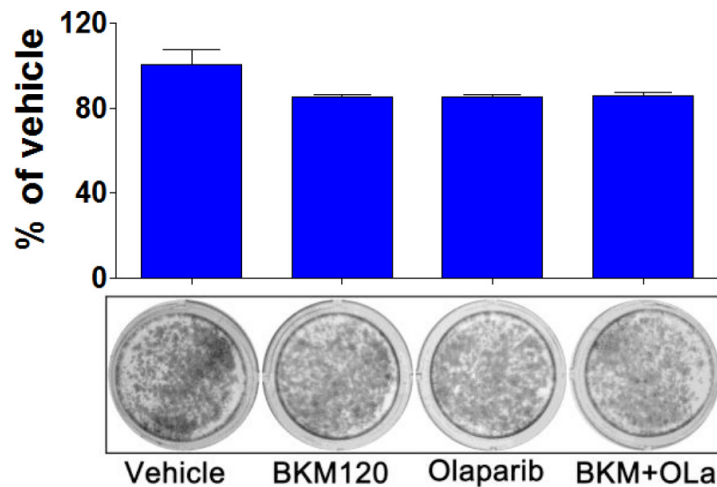

**Supplementary Figure S7: Responses of mouse ovarian surface epithelial cells to BKM120 and Olaparib as single agents and in combination.** Ovarian surface epithelial cells isolated from mouse ovaries were cultured in plates with or without 1  $\mu$ M BKM120, 2  $\mu$ M Olaparib or in combination. On day 10, the plates were stained with crystal violet and representative images were shown. Mean  $\pm$  S.D. for three independent experiments were shown.
